# Supplementary material
Source: publisher figshare collection journal article supplement (https://acs.figshare.com/ndownloader/files/5149618)

## Supporting Information

### Triethylsilane-Indium(III) Chloride System as a Radical Reagent

Naoki Hayashi, Ikuya Shibata, and Akio Baba\*

*Department of Molecular Chemistry, Science and Technology Center for Atoms, Molecules and Ions Control (STAMIC), Graduate School of Engineering, Osaka University, 2-1 Yamadaoka, Suita, Osaka 565-0871, Japan*

#### General:

IR spectra were recorded as thin film on a Horiba FT-720 spectrometer. All the  $^1\text{H}$  and  $^{13}\text{C}$ -NMR spectra were recorded with a JEOL JNM-GSX-270 (270 and 67 MHz, respectively) in deuteriochloroform ( $\text{CDCl}_3$ ) containing 0.03% (w/v) of tetramethylsilane. Mass spectra were recorded on a JEOL JMS-DS-303 spectrometer. Column chromatography was performed by using Fuji Davison silica gel FL-100DX.

#### A typical experimental procedure of the dehalogenation:

The 10 mL of round bottom flask charged with  $\text{InCl}_3$  (0.022 g, 0.1 mmol) was heated at 110 °C under reduced pressure for 1 h. After nitrogen was filled, MeCN (2 mL) and  $\text{Et}_3\text{SiH}$  (2.0 mmol) was added and the mixture was stirred at rt for 5 min. Then halide [alkyl halide, alkyl or aryl halide and olefin, or haloalkene (1.0 mmol)] and 1M  $\text{Et}_3\text{B}$  in hexane (0.1 mL) were added, and the resulting mixture was stirred at rt for 2 h. After deionized water was added, the reaction mixture was extracted with ether (10 mL x 3). The combined organic layer was dried over  $\text{MgSO}_4$  and concentrated. Yield of product was determined by  $^1\text{H}$  NMR. Purification was performed by column chromatography eluting with hexane/ $\text{EtOAc}$ =9/1. Further purification was performed by TLC eluting with hexane/ $\text{Et}_2\text{O}$ =9/1. Radical cyclization was performed under the same conditions by using haloalkenes **3** as starting materials.

#### 3-Isopropyl-2,3-dihydro-benzofuran (4a)

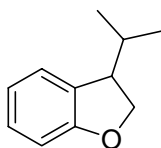

bp 60 °C/ 2 mmHg; IR (neat) 1018 (C-O-C), 1234 (C-O-C)  $\text{cm}^{-1}$ ;  $^1\text{H}$  NMR ( $\text{CDCl}_3$ , 270 MHz)  $\delta$  0.87 (d,  $J$ = 6.84 Hz, 3H), 0.95 (d,  $J$ = 6.84 Hz, 3H), 1.97 (qd,  $J$ = 6.84 and 6.59 Hz, 1H), 3.29-3.36 (m, 1H), 4.38 (dd,  $J$ = 5.13 and 9.03 Hz, 1H), 4.52 (t,  $J$ = 9.03 Hz, 1H), 6.76-6.88 (m, 2H), 7.10-7.20 (m, 2H);  $^{13}\text{C}$  NMR ( $\text{CDCl}_3$ , 67.9 MHz)  $\delta$  18.5, 19.8, 31.7, 48.1, 73.8, 109.3, 120.0, 125.0, 128.1, 129.4, 160.3; MS (EI)  $m/z$  162 ( $\text{M}^+$ , 24), 119 ( $\text{M}^+ - \text{CHCH}_3\text{CH}_3$ , 100), 118 (8), 91 (59), 65 (7), 39 (4); HRMS calcd for  $\text{C}_{11}\text{H}_{14}\text{O}$ : 162.1045, found:  $m/z$  162.1038 (EI, ( $\text{M}^+$ ), -0.7 mmu); Anal. calcd for  $\text{C}_{11}\text{H}_{14}\text{O}$ : C, 81.44; H, 8.70, found: C, 81.15; H, 8.63.

### 3-Benzyl-2,3-dihydro-benzofuran (4b)

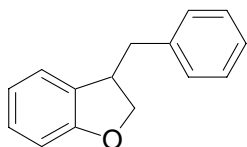

IR (neat) 1230 (C-O-C), 1597  $\text{cm}^{-1}$ ;  $^1\text{H}$  NMR ( $\text{CDCl}_3$ , 270 MHz)  $\delta$  2.83 (dd,  $J$ = 13.9 and 9.0 Hz, 1H), 3.06 (dd,  $J$ = 13.9 and 6.4 Hz, 1H), 3.74 (dddd,  $J$ = 9.0 and 8.8 and 6.4 and 6.0 Hz, 1H), 4.27 (dd,  $J$ = 8.8 and 6.0 Hz, 1H), 4.51 (t,  $J$ = 8.8 Hz, 1H), 6.78-6.84 (m, 2H), 6.95-6.98 (m, 1H), 7.09-7.34 (m, 6H);  $^{13}\text{C}$  NMR ( $\text{CDCl}_3$ , 67.9 MHz)  $\delta$  41.0, 43.4, 76.3, 109.6, 120.2, 124.5, 126.4, 128.3, 128.5, 128.9, 130.2, 139.1, 159.8; HRMS calcd for  $\text{C}_{15}\text{H}_{14}\text{O}$ : 210.10, found:  $m/z$  210.10 ( $\text{M}^+$ , -0.1 mmu).

#### A typical experimental procedure of the reduction of alkyne:

The 10 mL of round bottom flask charged with  $\text{InCl}_3$  (0.442 g, 2.0 mmol) was heated at 110  $^\circ\text{C}$  under reduced pressure for 1 h. After nitrogen was filled, MeCN (2 mL) and  $\text{Et}_3\text{SiH}$  (2.0 mmol) was added and the mixture was stirred at 0  $^\circ\text{C}$  for 5 min. Then alkyne (1.0 mmol) and 1M  $\text{Et}_3\text{B}$  in hexane (0.1 mL) were added, and the resulting mixture was stirred at 0  $^\circ\text{C}$  for 2 h. After deionized water was added, the reaction mixture was extracted with ether (10 mL x 3). The combined organic layer was dried over  $\text{MgSO}_4$  and concentrated. Yield of product was determined by  $^1\text{H}$  NMR. Purification was performed by column chromatography eluting with hexane/ $\text{EtOAc}$ =9/1. Further purification was performed by TLC eluting with hexane/ $\text{Et}_2\text{O}$ =9/1.

### 4,4-Bis(ethoxycarbonyl)-1-methyl-2-methylenecyclopentane (8a)

Reference : Crich, D.; Hwang, J.; Gastaldi, S.; Recupero, F.; Wink, D. J. *J. Org. Chem.* **1999**, 64, 2877-2882.

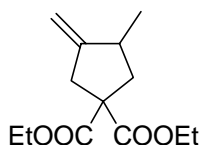

IR (neat) 1735  $\text{cm}^{-1}$ ;  $^1\text{H}$  NMR ( $\text{CDCl}_3$ , 270 MHz)  $\delta$  1.10 (d,  $J$ = 6.4 Hz, 3H), 1.25 (t,  $J$ = 7.3 Hz, 6H), 1.75 (t,  $J$ = 14.7 Hz, 1H), 2.57 (m, 2H), 3.00 (q,  $J$ = 17.1 Hz, 2H), 4.18 (m, 4H), 4.80 (d,  $J$ = 2.0 Hz, 1H), 4.91 (d,  $J$ = 2.0 Hz, 1H);  $^{13}\text{C}$  NMR ( $\text{CDCl}_3$ , 67.9 MHz)  $\delta$  14.0, 18.0, 37.3, 40.5, 42.1, 58.2, 61.4, 105.3, 153.4, 170.8.

### 3-Methyl-4-methylene-1-(toluene-4-sulfonyl)-pyrrolidine (8b)

Reference : Radetich, B.; RajanBabu, T. V. *J. Am. Chem. Soc.* **1998**, 120, 8007-8008.

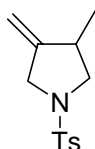

IR (neat) 1165, 1346  $\text{cm}^{-1}$ ;  $^1\text{H}$  NMR ( $\text{CDCl}_3$ , 270 MHz)  $\delta$  1.04 (d,  $J$ = 6.4 Hz, 3H), 2.44 (s, 3H), 2.67-2.73 (m, 2H), 3.51-3.62 (m, 1H), 3.73 (dd,  $J$ = 13.9 and 1.8 Hz, 1H), 3.95 (d,  $J$ = 13.9 Hz, 1H), 4.85 (dd,  $J$ = 4.4 and 2.2 Hz, 1H), 4.90 (dd,  $J$ = 4.0 and 2.2 Hz, 1H), 7.33 (d,  $J$ = 8.6 Hz, 2H), 7.71 (d,  $J$ = 6.6 Hz, 2H);  $^{13}\text{C}$  NMR ( $\text{CDCl}_3$ , 67.9 MHz)  $\delta$  16.1, 21.6, 37.4, 52.2, 55.1, 105.9, 127.7, 129.6, 132.7, 143.5, 149.2.

# <sup>1</sup>H NMR

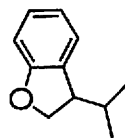

4a

| NO. | PPM     |    |
|-----|---------|----|
| 1   | 7.19591 | 21 |
| 2   | 7.16880 | 22 |
| 3   | 7.15434 | 23 |
| 4   | 7.15253 | 24 |
| 5   | 7.14711 | 25 |
| 6   | 7.12452 | 26 |
| 7   | 7.09741 | 27 |
| 8   | 7.09470 | 28 |
| 9   | 7.09199 | 29 |
| 10  | 6.87511 | 30 |
| 11  | 6.87149 | 31 |
| 12  | 6.84709 | 32 |
| 13  | 6.84348 | 33 |
| 14  | 6.81998 | 34 |
| 15  | 6.81637 | 35 |
| 16  | 6.79016 | 36 |
| 17  | 6.75944 | 37 |
| 18  | 4.55268 | 38 |
| 19  | 4.51834 | 39 |
| 20  | 4.48490 | 40 |
|     |         | 41 |
|     |         | 42 |
|     |         | 43 |
|     |         | 44 |

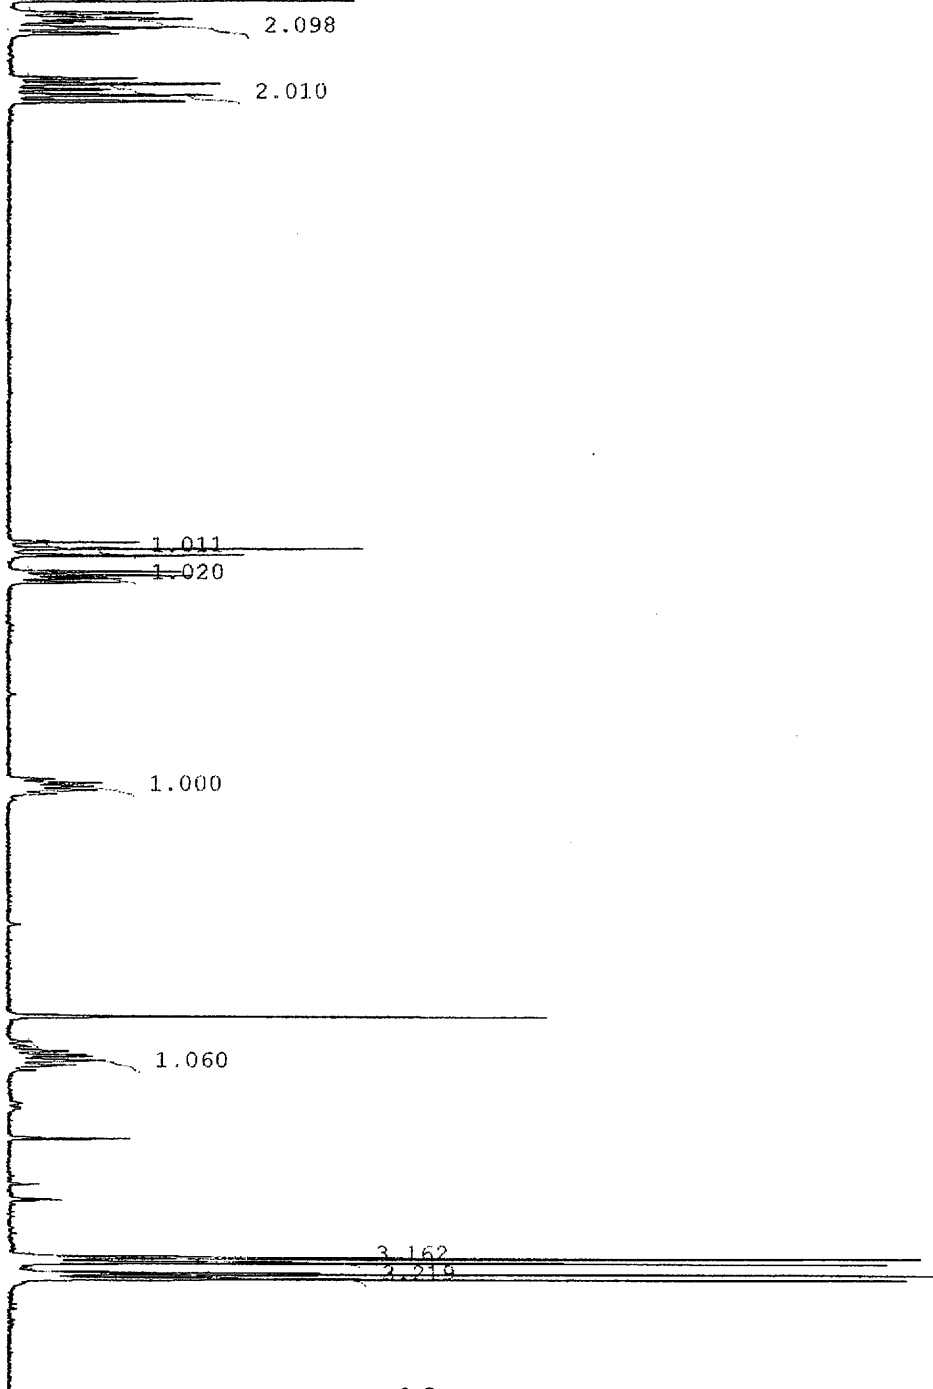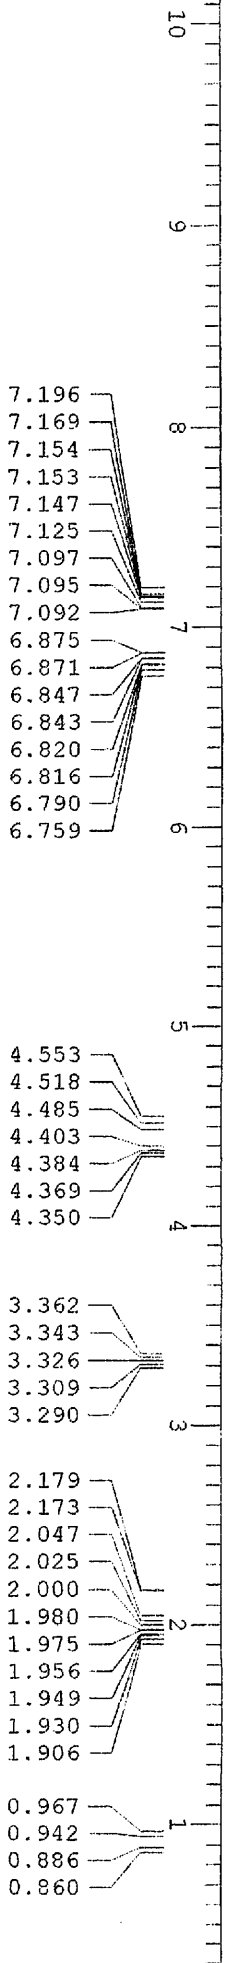

<sup>13</sup>C NMR

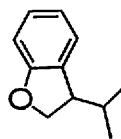

4a

| NO. | PPM       |
|-----|-----------|
| 1   | 160.29054 |
| 2   | 129.36409 |
| 3   | 128.05767 |
| 4   | 125.01697 |
| 5   | 119.99754 |
| 6   | 109.27107 |
| 7   | 77.47368  |
| 8   | 77.00000  |
| 9   | 76.53396  |
| 10  | 73.81415  |
| 11  | 48.13634  |
| 12  | 31.71812  |
| 13  | 19.84567  |
| 14  | 18.45520  |

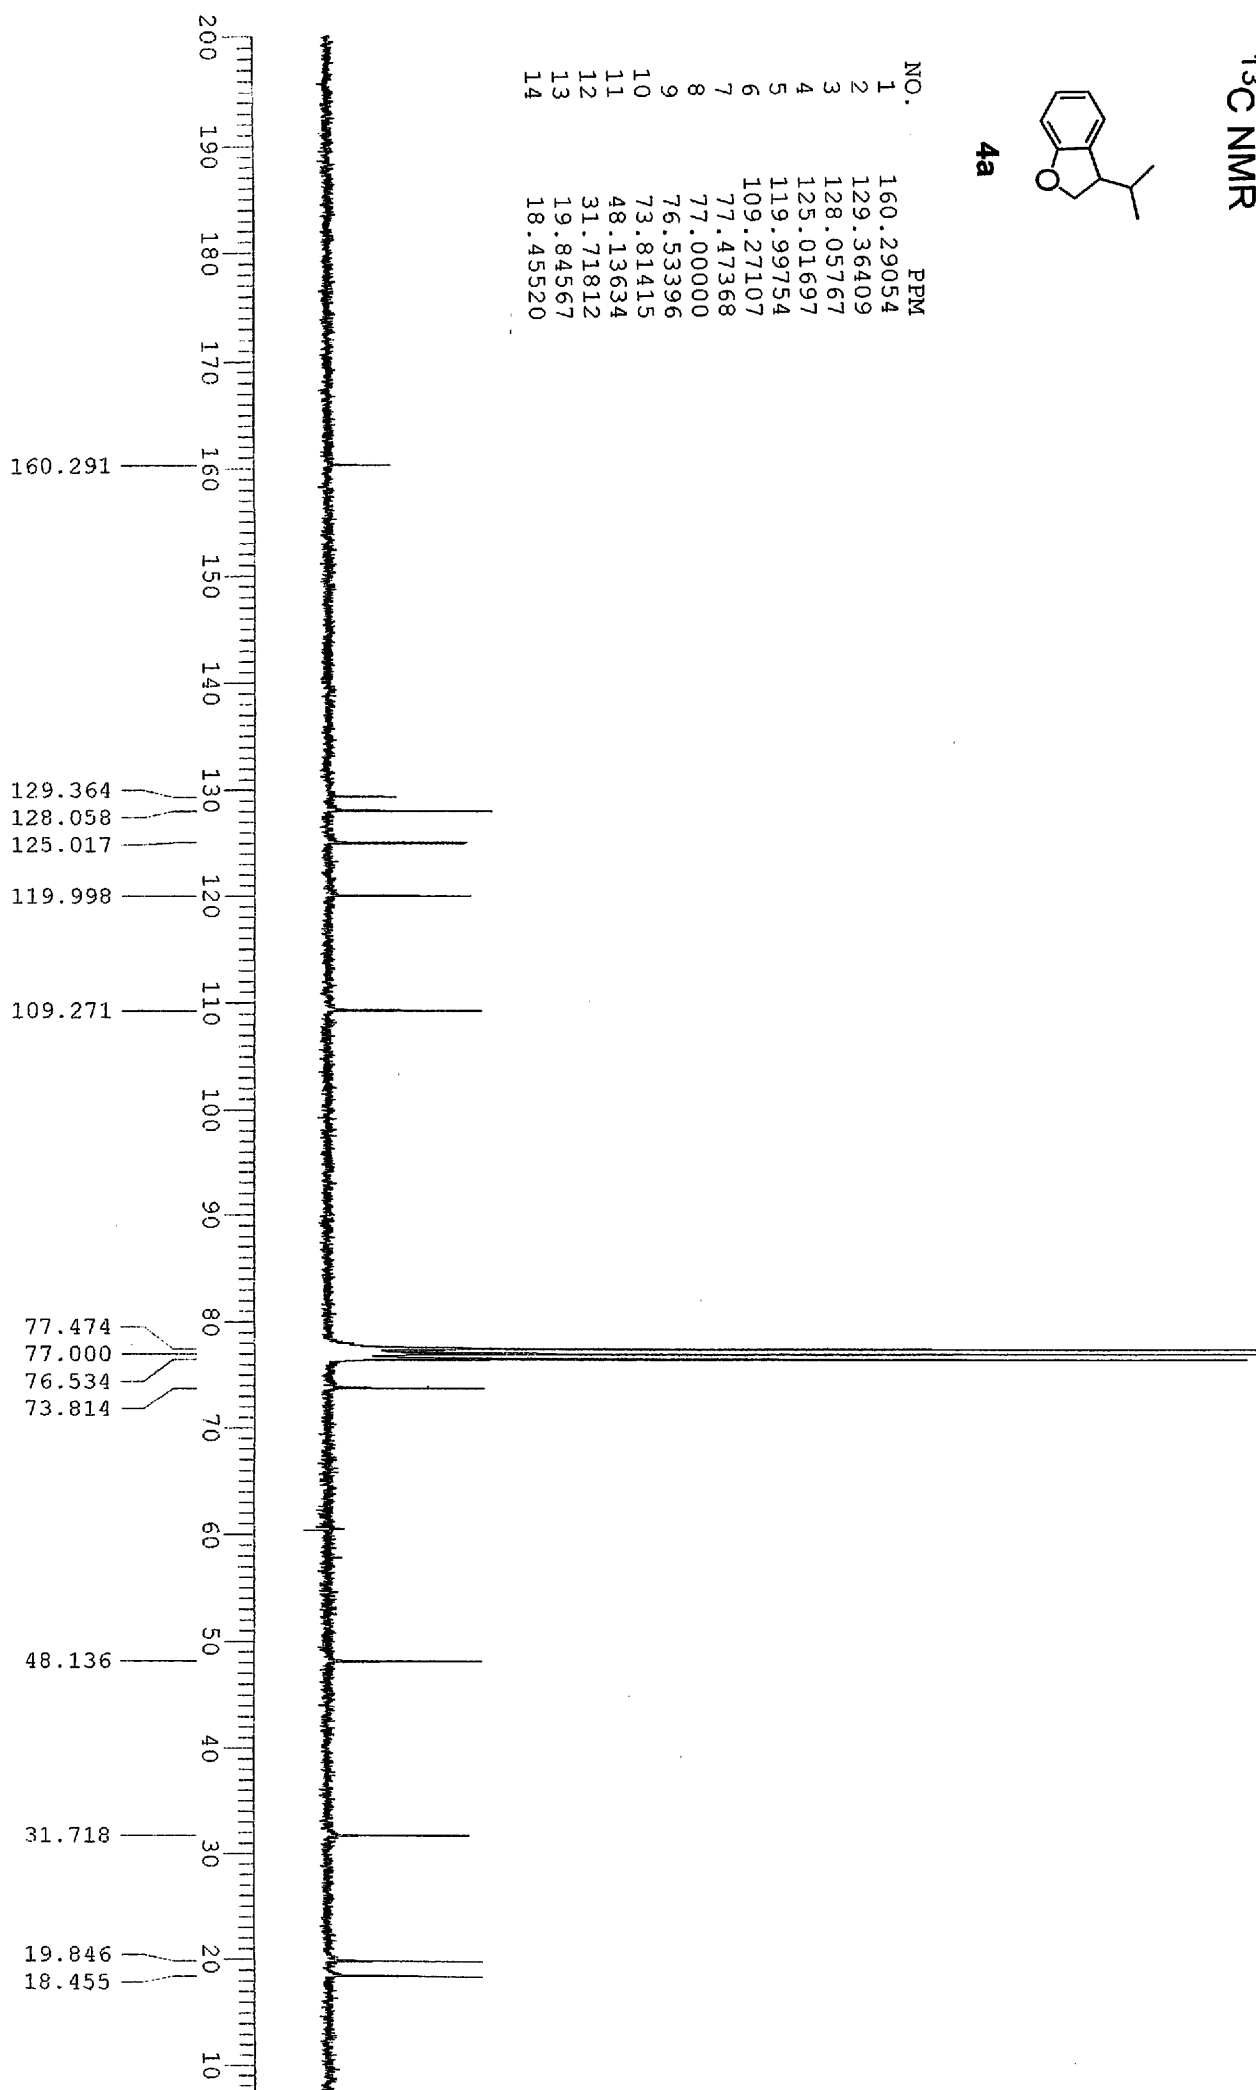

# <sup>1</sup>H NMR

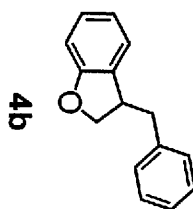

| NO. | PPM     |
|-----|---------|
| 1   | 7.35405 |
| 2   | 7.34772 |
| 3   | 7.32333 |
| 4   | 7.31700 |
| 5   | 7.29441 |
| 6   | 7.27001 |
| 7   | 7.26459 |
| 8   | 7.24832 |
| 9   | 7.24471 |
| 10  | 7.23115 |
| 11  | 7.20856 |
| 12  | 7.20223 |
| 13  | 7.17783 |
| 14  | 7.16338 |
| 15  | 7.16066 |
| 16  | 7.12994 |
| 17  | 7.10373 |
| 18  | 7.10102 |
| 19  | 6.99168 |
| 20  | 6.96276 |
| 21  | 6.84619 |
| 22  | 6.81637 |
| 23  | 6.78655 |
| 24  | 4.55991 |
| 25  | 4.52647 |
| 26  | 4.49394 |
| 27  | 4.31411 |
| 28  | 4.29152 |
| 29  | 4.28068 |
| 30  | 4.25808 |
| 31  | 3.81167 |
| 32  | 3.78908 |
| 33  | 3.77914 |
| 34  | 3.75655 |
| 35  | 3.73305 |
| 36  | 3.72402 |
| 37  | 3.70142 |
| 38  | 3.10500 |
| 39  | 3.08151 |
| 40  | 3.05349 |
| 41  | 3.03000 |
| 42  | 2.88812 |
| 43  | 2.85469 |
| 44  | 2.83752 |
| 45  | 2.80408 |

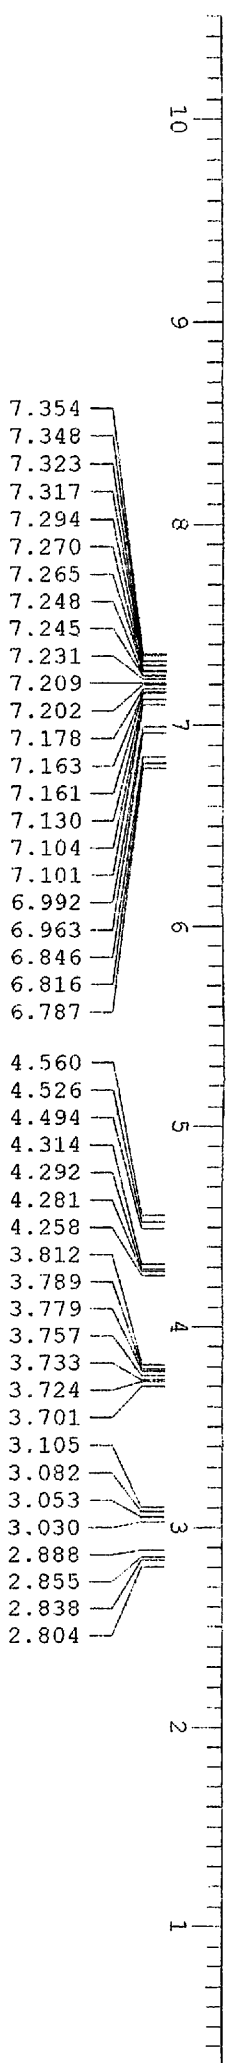

# <sup>13</sup>C NMR

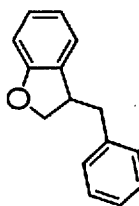

4b

| NO. | PPM       |
|-----|-----------|
| 1   | 159.83214 |
| 2   | 139.08208 |
| 3   | 130.19684 |
| 4   | 128.91333 |
| 5   | 128.47786 |
| 6   | 128.27922 |
| 7   | 126.37688 |
| 8   | 124.45925 |
| 9   | 120.20381 |
| 10  | 109.55375 |
| 11  | 77.47368  |
| 12  | 77.00000  |
| 13  | 76.53396  |
| 14  | 76.25893  |
| 15  | 43.40722  |
| 16  | 41.03120  |

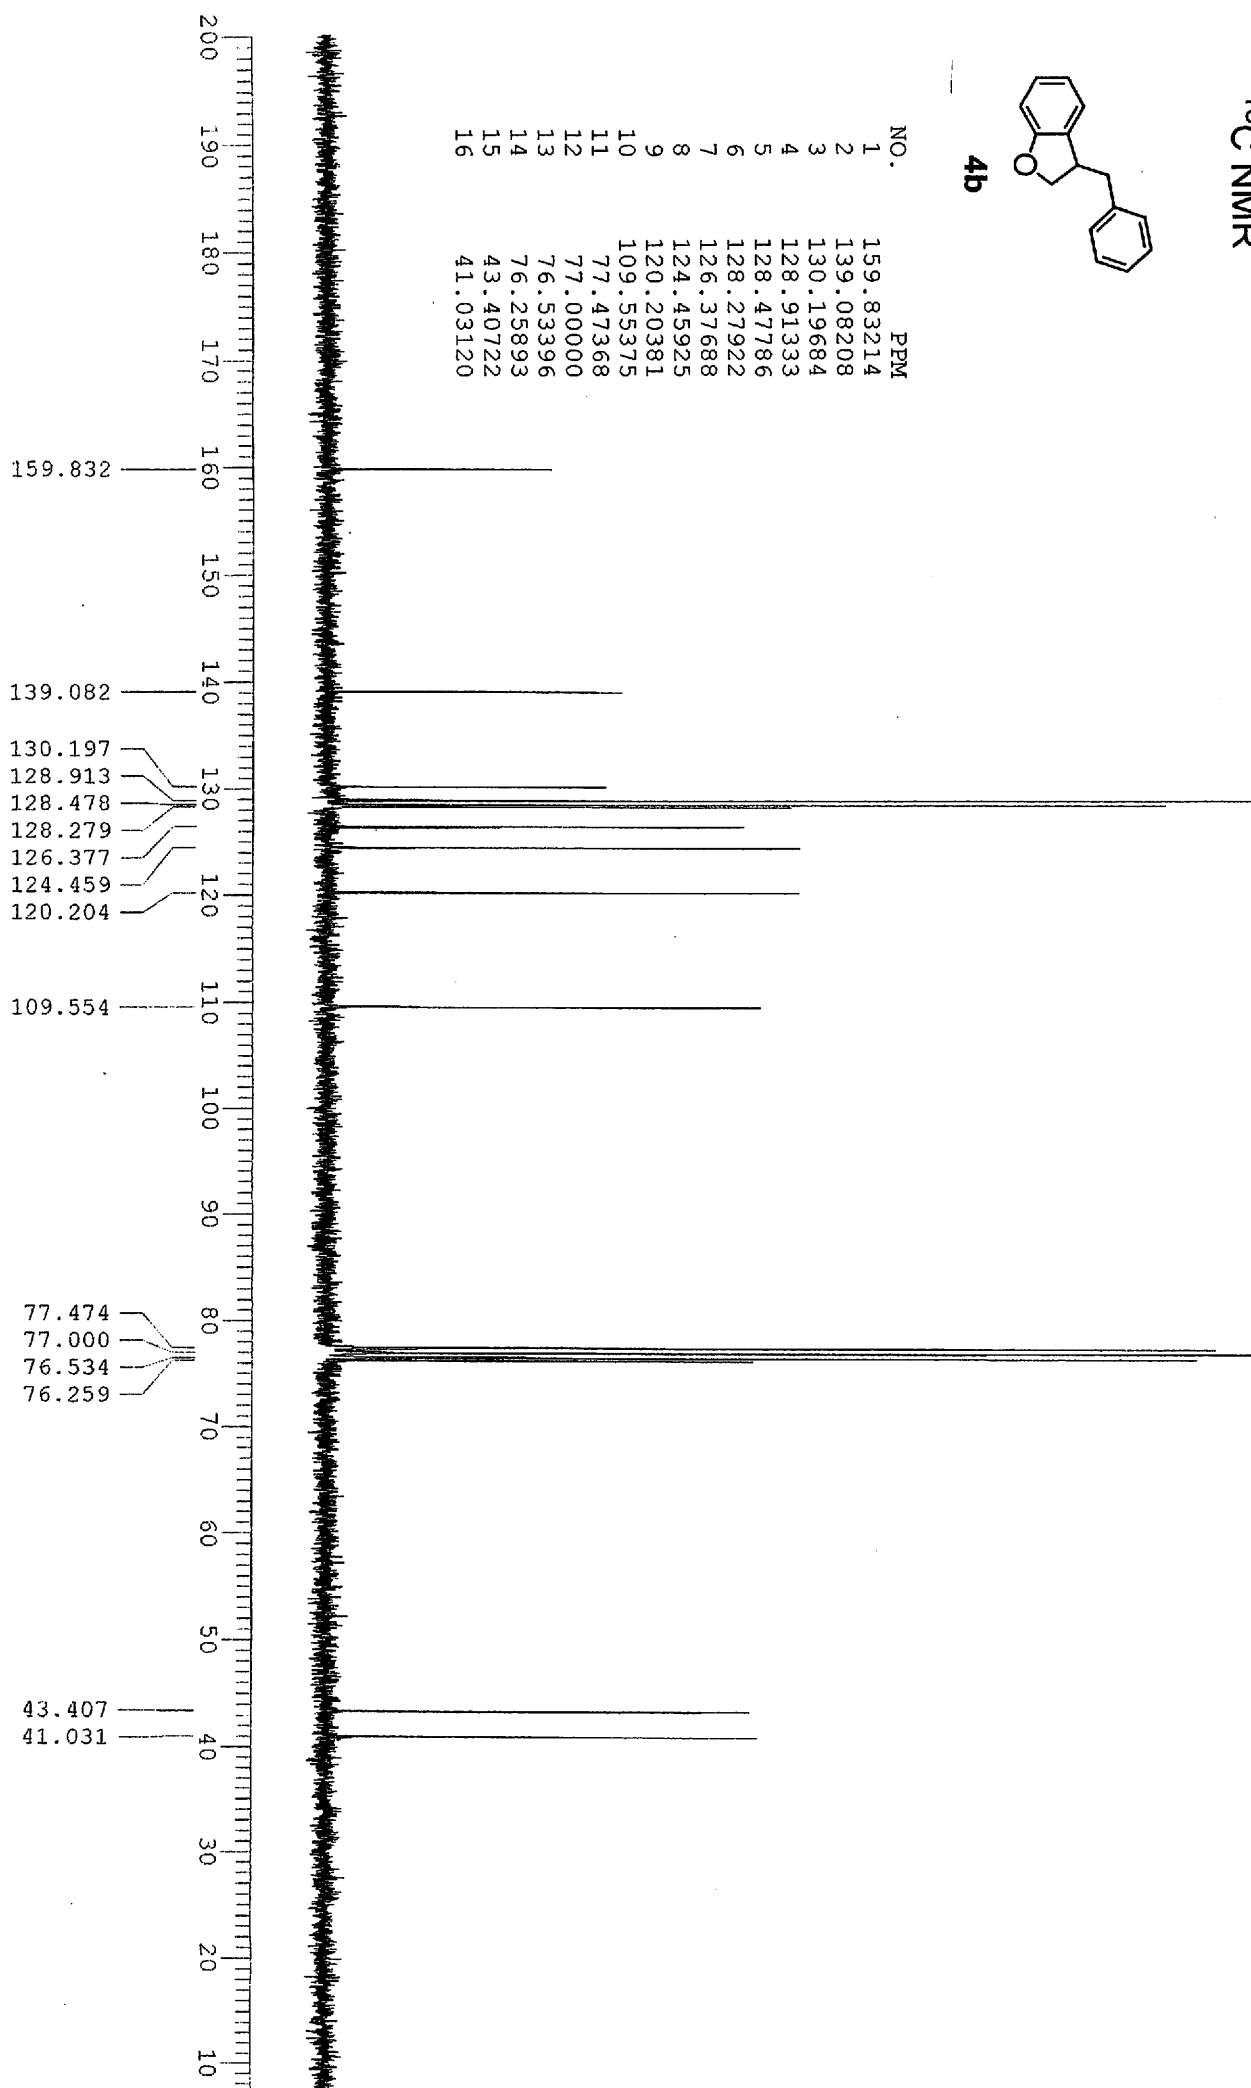

NO.

| NO. | PPM     |    |         |    |         |    |         |
|-----|---------|----|---------|----|---------|----|---------|
| 1   | 5.64612 | 13 | 4.22465 | 26 | 2.90439 | 39 | 1.75402 |
| 2   | 5.61991 | 14 | 4.21923 | 27 | 2.82577 | 40 | 1.74769 |
| 3   | 5.58286 | 15 | 4.20386 | 28 | 2.80137 | 41 | 1.69890 |
| 4   | 5.22049 | 16 | 4.19844 | 29 | 2.79233 | 42 | 1.64739 |
| 5   | 5.15633 | 17 | 4.19302 | 30 | 2.65317 | 43 | 1.28411 |
| 6   | 5.11928 | 18 | 4.17766 | 31 | 2.62516 | 44 | 1.27417 |
| 7   | 5.08042 | 19 | 4.17224 | 32 | 2.56913 | 45 | 1.27056 |
| 8   | 4.91144 | 20 | 4.16681 | 33 | 2.53931 | 46 | 1.25791 |
| 9   | 4.90421 | 21 | 4.15145 | 34 | 2.51129 | 47 | 1.24797 |
| 10  | 4.80300 | 22 | 4.14061 | 35 | 2.02964 | 48 | 1.24435 |
| 11  | 4.79486 | 23 | 3.08603 | 36 | 2.01970 | 49 | 1.23170 |
| 12  | 4.25176 | 24 | 3.02367 | 37 | 2.00976 | 50 | 1.22176 |
|     |         | 25 | 2.96674 | 38 | 1.80462 | 51 | 1.21724 |

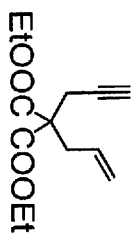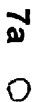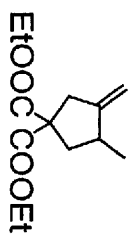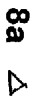

Reference : Crich, D.; Hwang, J.; Gastaldi, S.; Recupero, F.; Wink, D. J. *J. Org. Chem.* **1999**, *64*, 2877-2882.

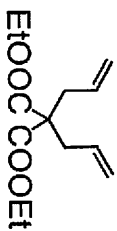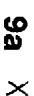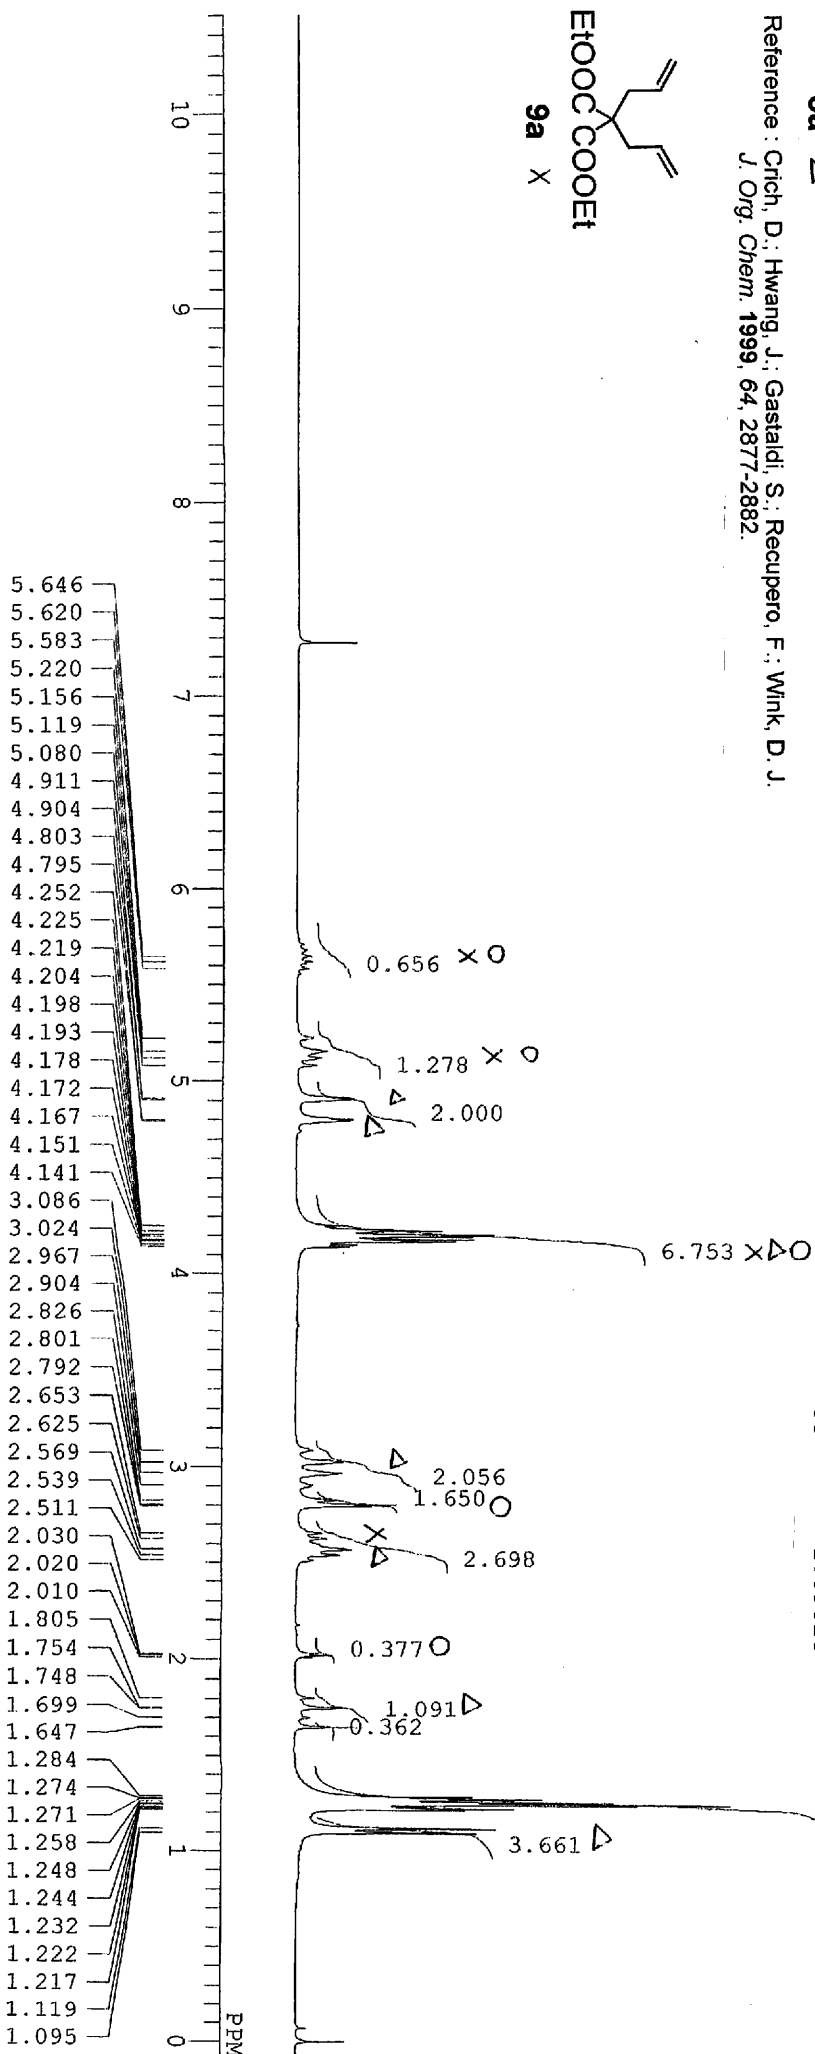

<sup>13</sup>C NMR

| NO. | PPM       |
|-----|-----------|
| 1   | 171.88795 |
| 2   | 171.76572 |
| 3   | 170.64265 |
| 4   | 169.59597 |
| 5   | 153.30764 |
| 6   | 132.22143 |
| 7   | 131.63315 |
| 8   | 119.77598 |
| 9   | 119.08838 |
| 10  | 105.33651 |
| 11  | 78.83358  |
| 12  | 77.46604  |
| 13  | 77.00000  |
| 14  | 76.52632  |
| 15  | 71.36173  |
| 16  | 61.64374  |
| 17  | 61.41454  |
| 18  | 61.21590  |
| 19  | 58.16757  |
| 20  | 57.21258  |
| 21  | 56.57082  |
| 22  | 42.09315  |
| 23  | 40.47349  |
| 24  | 37.27235  |
| 25  | 36.71464  |
| 26  | 36.32500  |
| 27  | 22.53493  |
| 28  | 17.98153  |
| 29  | 14.14628  |
| 30  | 14.08516  |
| 31  | 14.04696  |

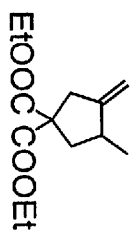

8a Δ

Reference : Crich, D.; Hwang, J.; Gastaldi, S.; Recupero, F.; Wink, D. J.  
*J. Org. Chem.* **1999**, *64*, 2877-2882.

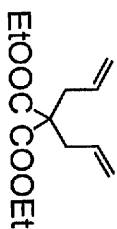

9a X

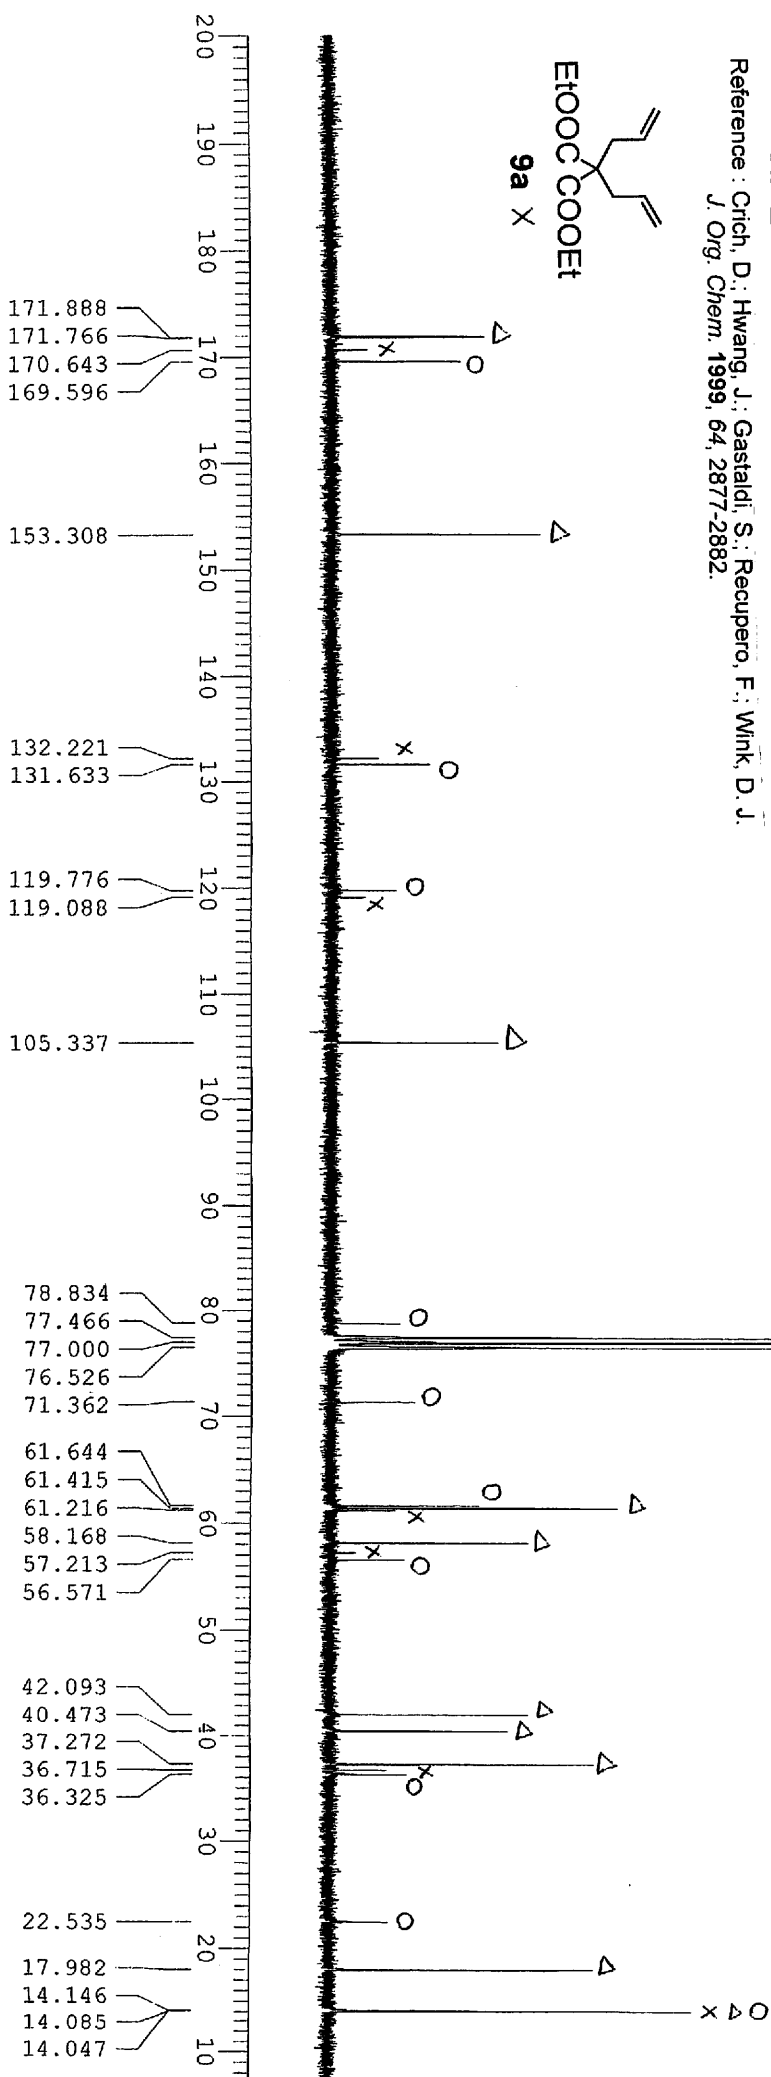

# <sup>1</sup>H NMR

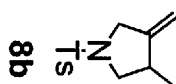

Reference : Radetich, B.; RajanBabu, T. V.  
*J. Am. Chem. Soc.* 1998, 120, 8007-8008.

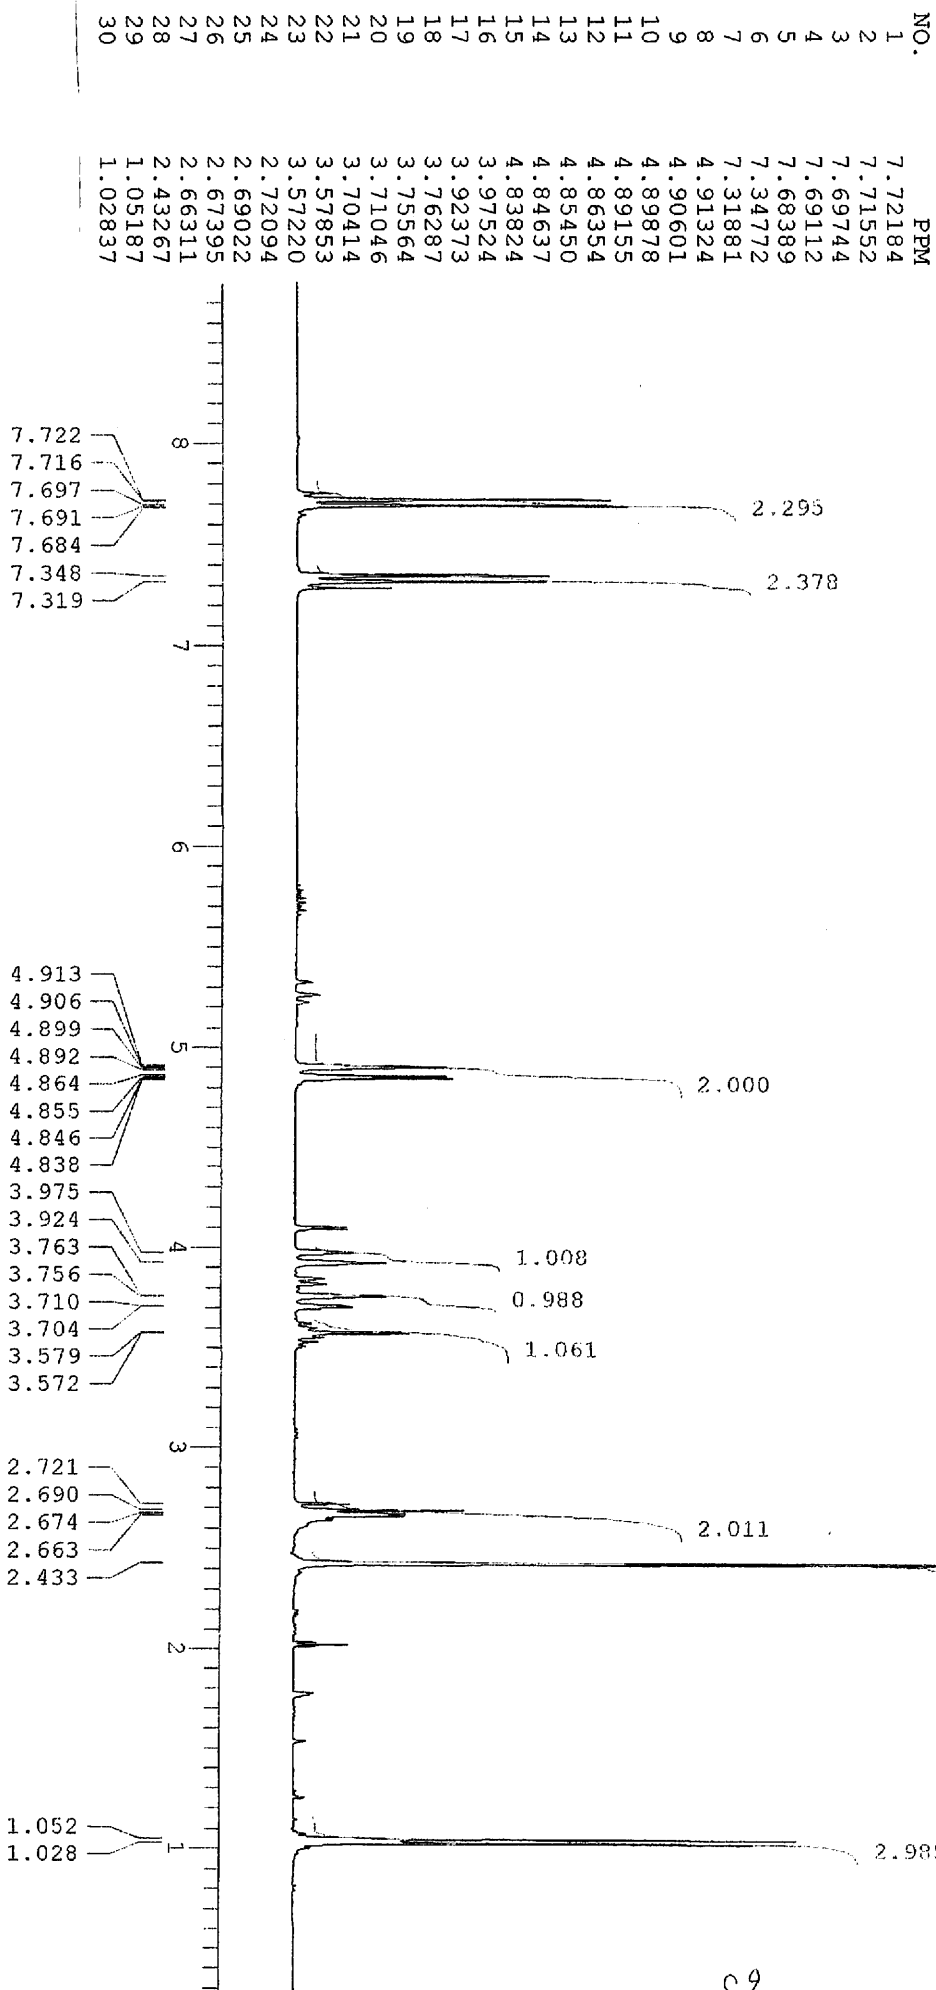

# <sup>13</sup>C NMR

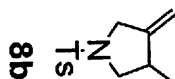

Reference : RadetiCh, B.; RajanBabu, T.V.  
J. Am. Chem. Soc. 1998, 120, 8007-8008.

| NO. | PPM       |
|-----|-----------|
| 1   | 149.16680 |
| 2   | 143.49797 |
| 3   | 132.73330 |
| 4   | 129.58565 |
| 5   | 127.69859 |
| 6   | 105.94006 |
| 7   | 77.47368  |
| 8   | 77.00000  |
| 9   | 76.53396  |
| 10  | 55.05048  |
| 11  | 52.14730  |
| 12  | 37.43279  |
| 13  | 21.55702  |
| 14  | 16.06390  |

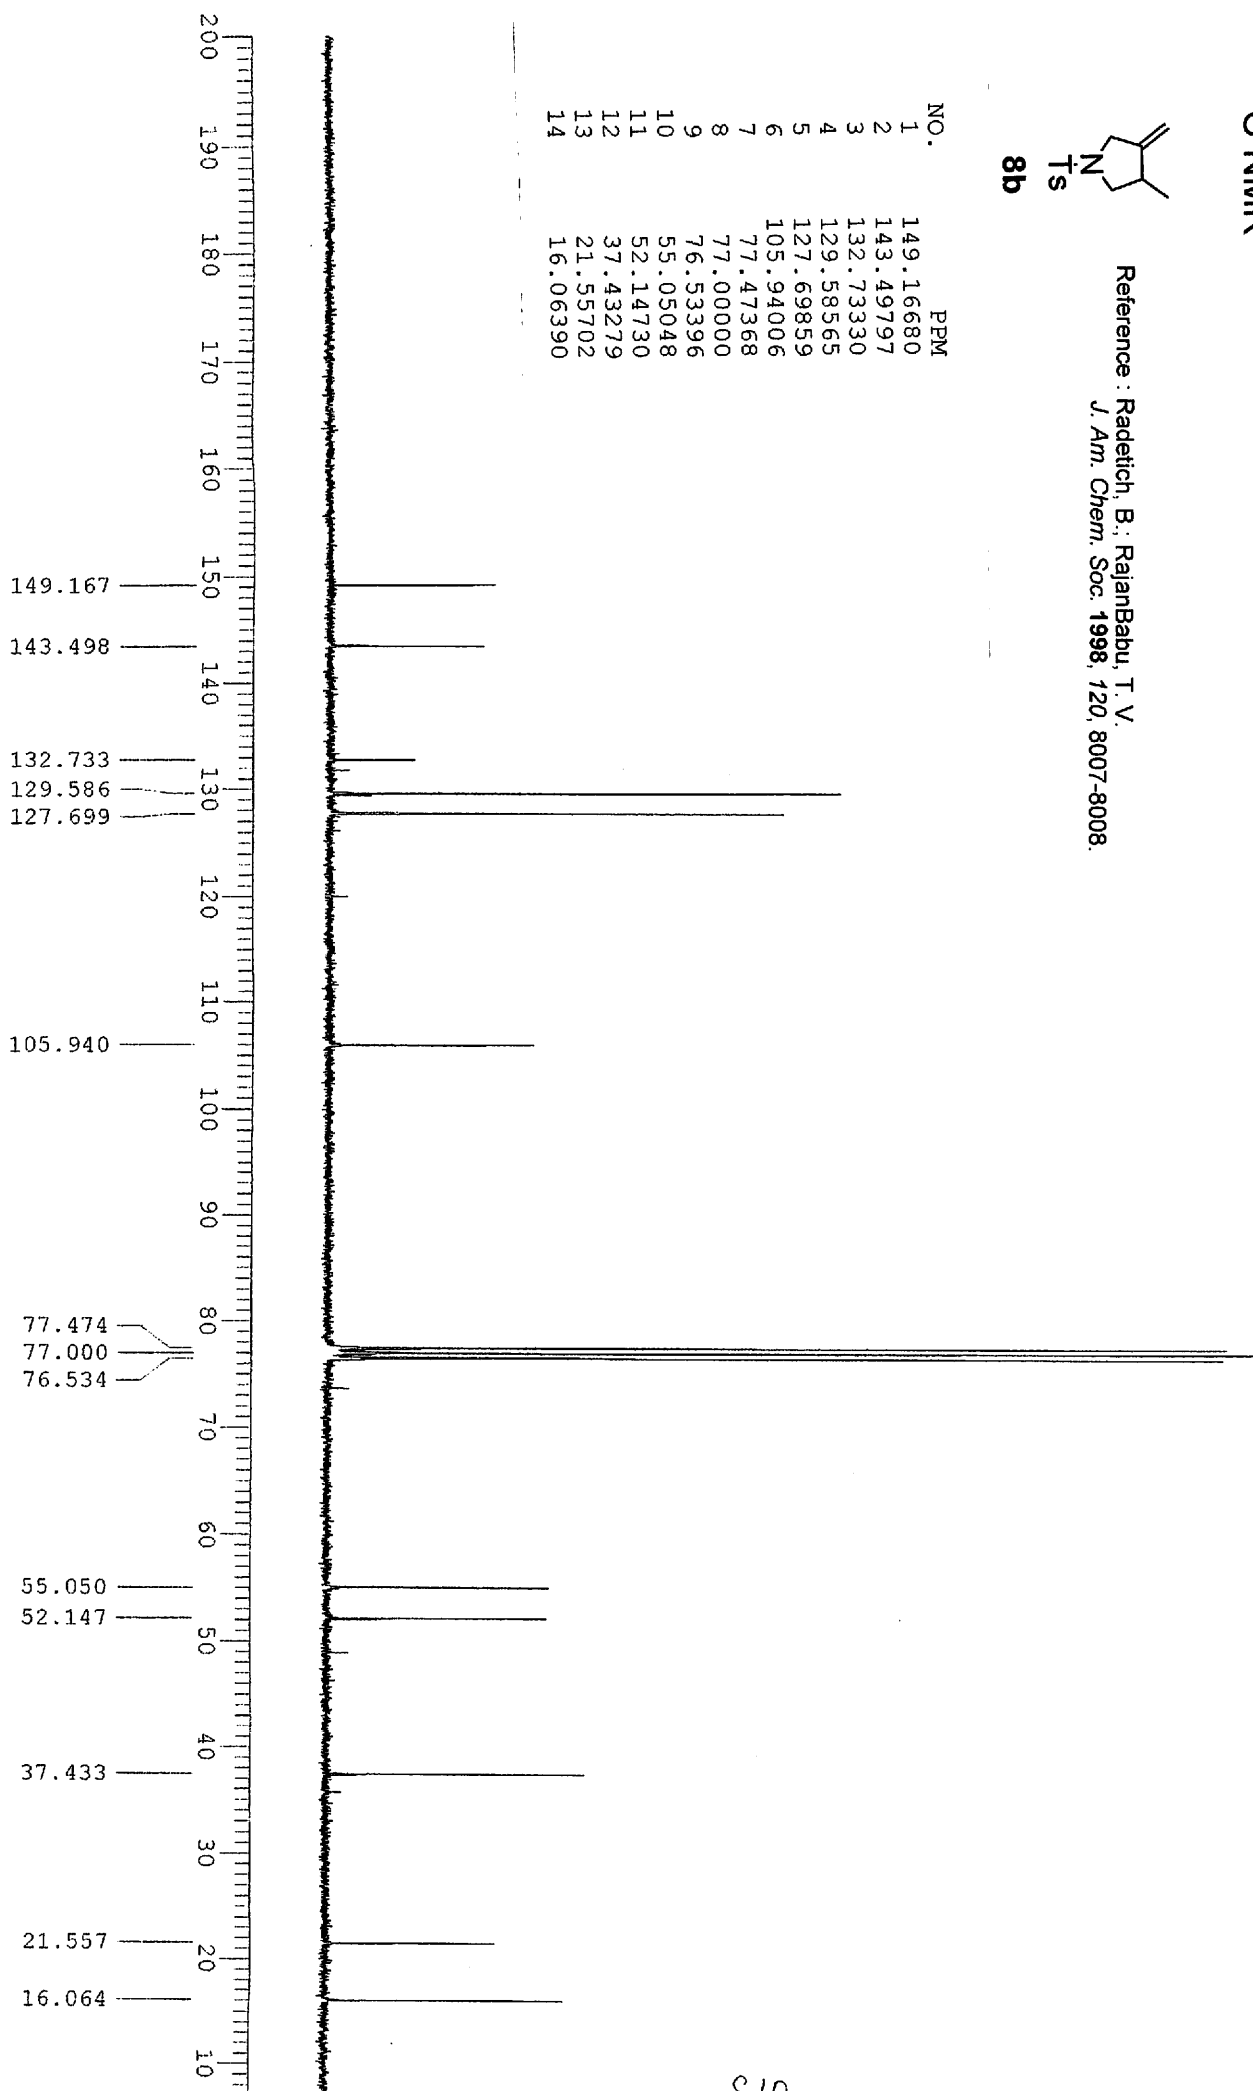

Supplement: Supplementary file 1 [file 5149618]
